# Supplementary material for: Novel ABC Transporter Associated with Fluconazole Resistance in Aging of Cryptococcus neoformans
Source: MDPI journal article supplement (doi:10.3390/jof8070677), 2022-06-28
Supplement: s1 [file s1]

**Table S1. List of Primers**

|                                |                                                                            |
|--------------------------------|----------------------------------------------------------------------------|
| <i>AFR3</i> + <i>pGAL1</i> F   | CCTCTATACTTTAACGTCAAGGAGAAAAAAATGTCTGCCATCGCCATCGA                         |
| <i>AFR3</i> + <i>CYC1</i> tt R | TGAATGTAAGCGTGACATAACTAATTACATGATTTACTTGCGCAACGTGAGAG                      |
| <i>AFR3</i> F                  | ATGTCTGCCATCGCCATCGA                                                       |
| <i>AFR3</i> R                  | TTACTTGCGCAACGTGAGAG                                                       |
| qPCR <i>AFR3</i> F             | GCCCATAGCACTAGGAGTCG                                                       |
| qPCR <i>AFR3</i> R             | ATGTCATCCTGCGAATAGCC                                                       |
| <i>Sc ACT1</i> F               | ATGGATTCTGAGGTTGCTGC                                                       |
| <i>Sc ACT1</i> R               | GGTGTCTTGGTCTACCGACG                                                       |
| NBD + <i>pGAL1</i> F           | CCTCTATACTTTAACGTCAAGGAGAAAAAAATGCTTTGATCAAATCTTCCTTC<br>TGGC              |
| GFP F                          | CCTCTATACTTTAACGTCAAGGAGAAAAAAAGCTTTTTTAATTAACAGTAAA<br>GGAGA              |
| GFP R                          | TGAATGTAAGCGTGACATAACTAATTACATGATGGCGCGCCCTATTGTATAGT<br>TCATCC            |
| <i>AFR3</i> GFP R              | AACAAGAATTGGGACAACCTCCAGTGAAAAGTTCTTCTCCTTTACTCTTGCGCA<br>ACGTGAGAGTGAGCCA |
| <i>Cn ACT1</i> F               | CCCACACTGTCCCCATTTAC                                                       |
| <i>Cn ACT1</i> R               | AACCACGCTCCATGAGAATC                                                       |
| qPCR <i>AFR1</i> F             | CTTTCCGAGCTGGTGAATC                                                        |
| qPCR <i>AFR1</i> R             | CACCTTCGATCACACCAATG                                                       |
| qPCR <i>AFR2</i> F             | GGTCCGACTACATGGCTGT                                                        |
| qPCR <i>AFR2</i> R             | GAGTTCACCAGCTCGGAAAG                                                       |
| qPCR <i>MDR1</i> F             | CTCTTGATCACATCGCGAAA                                                       |
| qPCR <i>MDR1</i> R             | ACCGACAATCTTGCTCTGCT                                                       |

**A**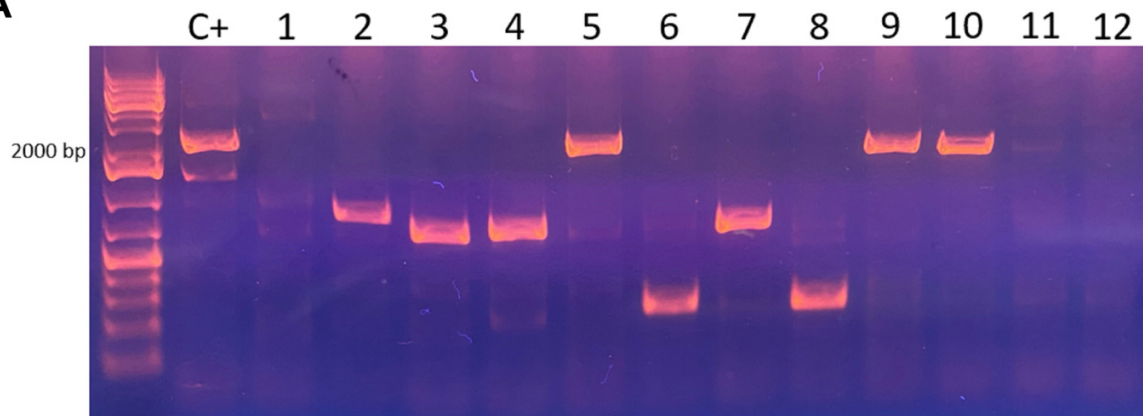**B**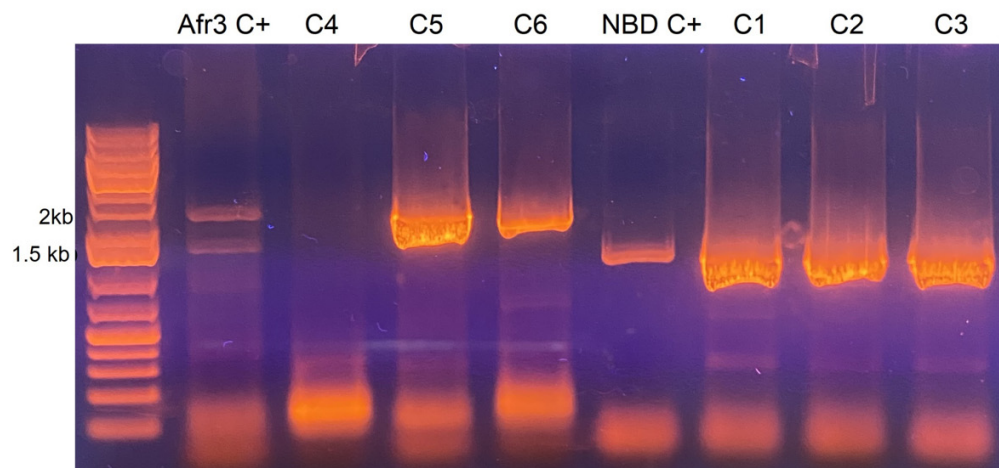**C**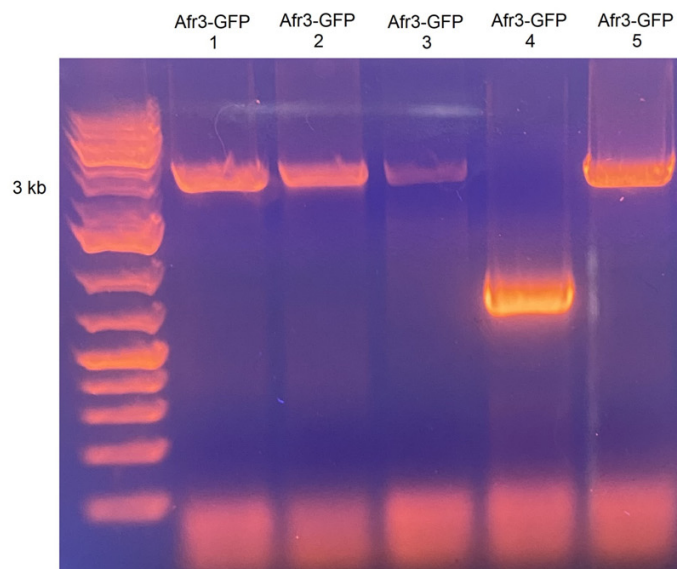

**Figure S1. Confirmation of *Saccharomyces cerevisiae* Transformants.** (A) Plasmids were extracted from ADΔ cells and PCR was performed for the Afr3 cassette. PCR samples were run in a 0.8 % agarose gel and positive colonies were identified by the correct size of amplification (2 kb); (B) Plasmids were extracted from ADΔ cells and PCR was performed for the Afr3 cassette and the Afr3-NBD cassette. PCR samples were run in a 0.8 % agarose gel and positive colonies were identified by the correct size of amplification (Afr3 = 2 kb, Afr3-NBD = 1.5 kb); (C) Plasmids were extracted from ADΔ cells and PCR was performed for the Afr3-GFP cassette. PCR samples were run in a 0.8 % agarose gel and positive colonies were identified by the correct size of amplification (3 kb).

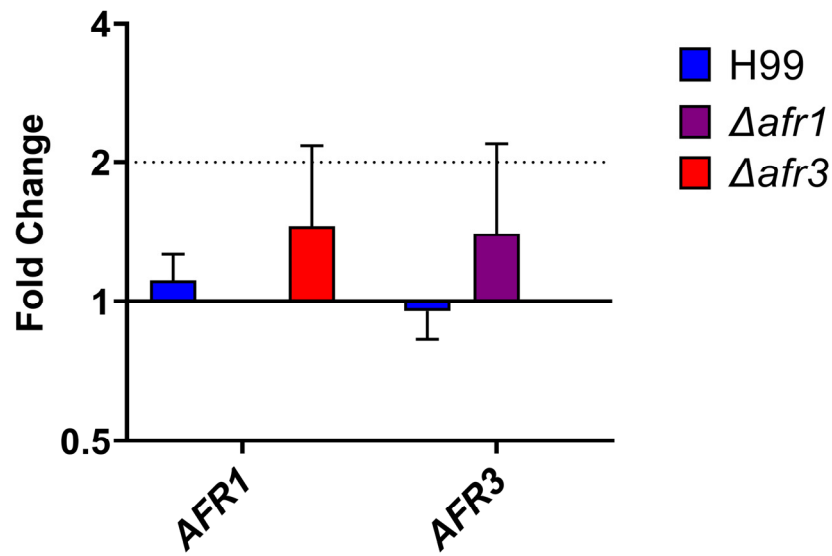

**Figure S2. Pump Compensation between Afr1 and Afr3.** Cells from H99,  $\Delta afr1$ , and  $\Delta afr3$  strains had their RNA extracted, followed by cDNA conversion, and expression analysis for *AFR1* and *AFR3*. *ACT1* gene was used as a house keeping control for amplification.

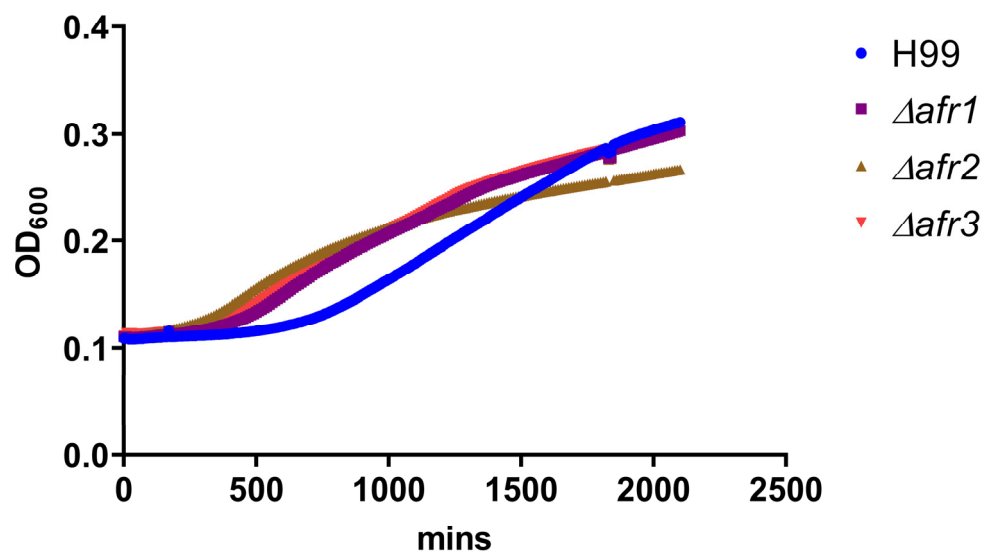

**Figure S3. Growth Curves.** Cells from H99,  $\Delta afr1$ ,  $\Delta afr2$ , and  $\Delta afr3$  strains were monitored in a Spectrophotometer for 72 h, at 37 °C with shaking.
